# Supplementary material for: Characterizing the interaction between methyl ferulate and human serum albumin by saturation transfer difference NMR
Source: Royal Society of Chemistry journal article supplement (doi:10.1039/d0ra05844k), 2020-01-01
Supplement: d0ra05844k1.pdf [file d0ra05844k1.pdf]

## Supplementary Information

### Characterizing the interaction between methyl ferulate and human serum albumin by saturation transfer difference NMR technique

Wenjing Wang<sup>a</sup>, Qiaomei Sun<sup>\*,a</sup>, Na Gan<sup>a</sup>, Yuanming Zhai<sup>\*,b</sup>, Hongzhao Xiang<sup>a</sup>,  
Hui Li<sup>a</sup>

<sup>a</sup> School of Chemical Engineering, Sichuan University, Chengdu 610065, China

<sup>b</sup> Analytical & Testing Center, Sichuan University, Chengdu 610065, China

**\*Corresponding author:**

Dr. Qiaomei Sun, E-mail address: qiaomeisun@163.com. Phone: +86 18200261093.

Address: School of Chemical Engineering, Sichuan University, Chengdu, Sichuan,  
China

Dr. Yuanming Zhai, E-mail address: yuanmingzhai@scu.edu.cn. Phone: +86  
13709089605. Address: Analytical & Testing Center, Sichuan University, Chengdu,  
Sichuan, China

**Table S1**  $\eta(t_{sat})$  values for each ligand proton of MF ( $1.3 \times 10^{-3}$  M) for its interaction with HSA

( $10 \times 10^{-6}$  M).

| proton | 0.5s  | 0.75s | 1.0s  | 1.5s  | 2s    | 5s    |
|--------|-------|-------|-------|-------|-------|-------|
| H1     | 0.134 | 0.195 | 0.227 | 0.316 | 0.355 | 0.424 |
| H2     | 0.133 | 0.182 | 0.254 | 0.320 | 0.360 | 0.433 |
| H3     | 0.123 | 0.188 | 0.231 | 0.280 | 0.315 | 0.363 |
| H4     | 0.155 | 0.201 | 0.267 | 0.338 | 0.396 | 0.449 |
| H5     | 0.147 | 0.207 | 0.273 | 0.354 | 0.393 | 0.450 |
| H6     | 0.119 | 0.164 | 0.198 | 0.272 | 0.300 | 0.339 |
| H8     | 0.126 | 0.184 | 0.234 | 0.288 | 0.327 | 0.378 |

Values obtained by scaling the off-resonance spectrum to the difference spectrum.

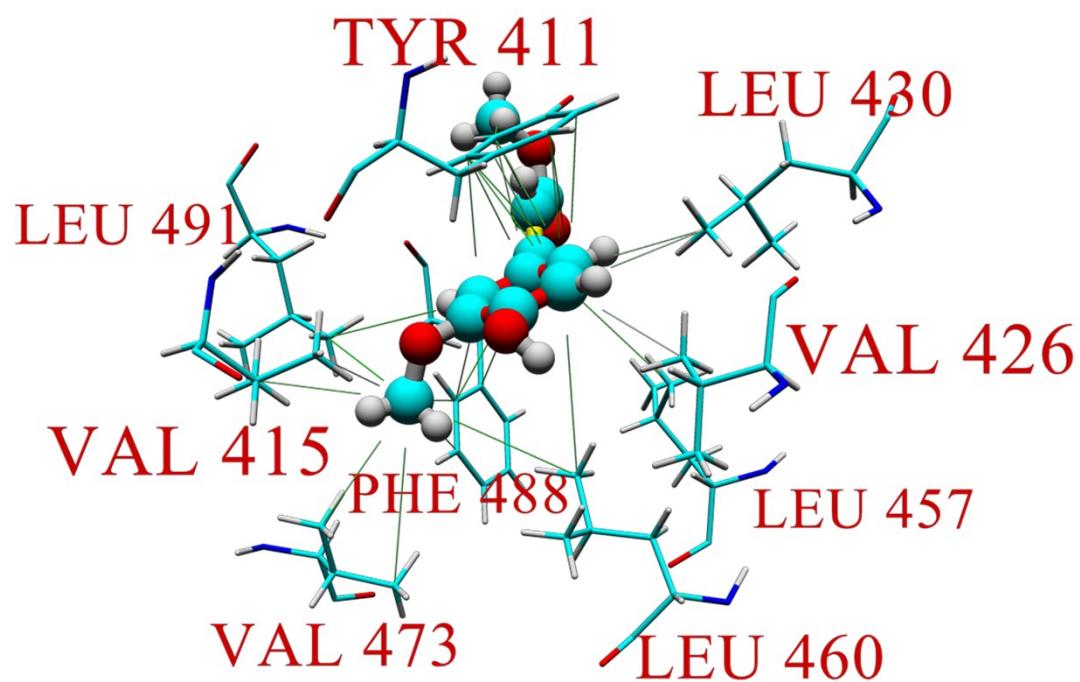

**Figure S1** 3D diagram of amino acid residues that interact with MF. Green line represents

hydrophobic force.
